# Supplementary material for: Structural elucidation of polydopamine facilitated by ionic liquid solvation
Source: Research Square preprint supplement (doi:10.21203/rs.3.rs-1939091/v1), 2022-10-20
Supplement: Supplementary file 1 [file eef734c478d10fefdd5b6953.pdf]

# **Structural Elucidation of polydopamine facilitated by ionic liquid solvation**

Abhishek Singh<sup>1,2</sup>, Thomas G. Mason<sup>1</sup>, Zhenzhen Lu<sup>1</sup>, Anita J. Hill<sup>3</sup>, Steven J. Pas<sup>4</sup>, Boon Mia Teo<sup>1</sup>, Benny D. Freeman<sup>4</sup> and Ekaterina I. Izgorodina<sup>1,\*</sup>

<sup>1</sup>School of Chemistry, Monash University, Clayton, Melbourne, VIC 3800, Australia

<sup>2</sup>IITB-Monash Research Academy, Bombay 400076, India

<sup>3</sup>Manufacturing, CSIRO, Clayton, VIC 3168, Australia

<sup>4</sup> Maritime Division, Defence Science and Technology Group, Department of Defence, 506 Lorimer St Fisherman's Bend, VIC 3207, Australia

<sup>5</sup>Department of Chemical Engineering, The University of Texas at Austin, Austin, TX 78712, USA

† These authors contributed equally to this work

\*Corresponding author. [katya.pas@monash.edu](mailto:katya.pas@monash.edu)

## **This PDF file includes**

1. Supplementary Figures S1 to S24
2. Supplementary Tables S1 to S10
3. References

**Supplementary Figure 1.** (A) Schematic view of eumelanin and pDA-melanin synthetic pathways. Structural models of pDA – B<sup>1</sup>, C<sup>2</sup>, D<sup>3</sup>, E<sup>4</sup>, F<sup>5</sup>, G<sup>6</sup>, H<sup>7</sup>, I<sup>8</sup> and J<sup>9</sup> – postulated between 2012 and 2018.

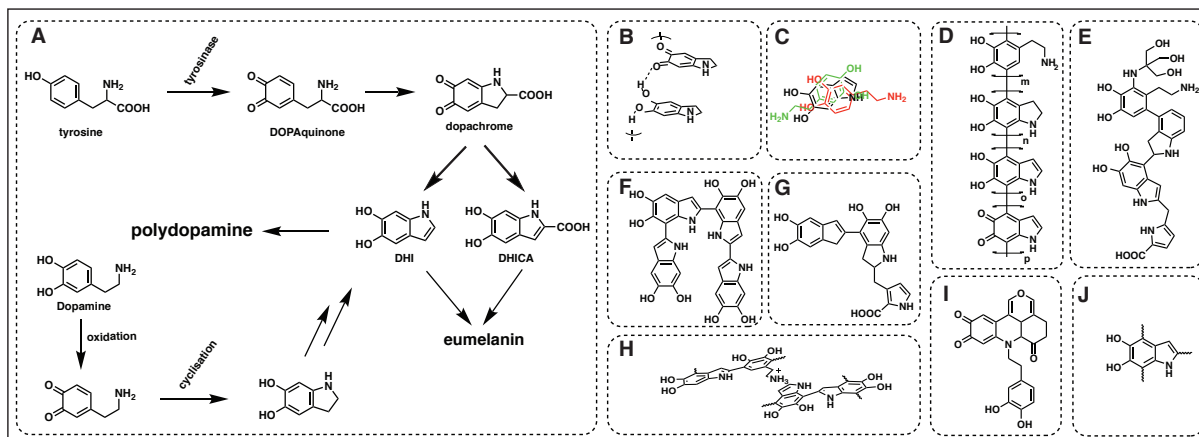

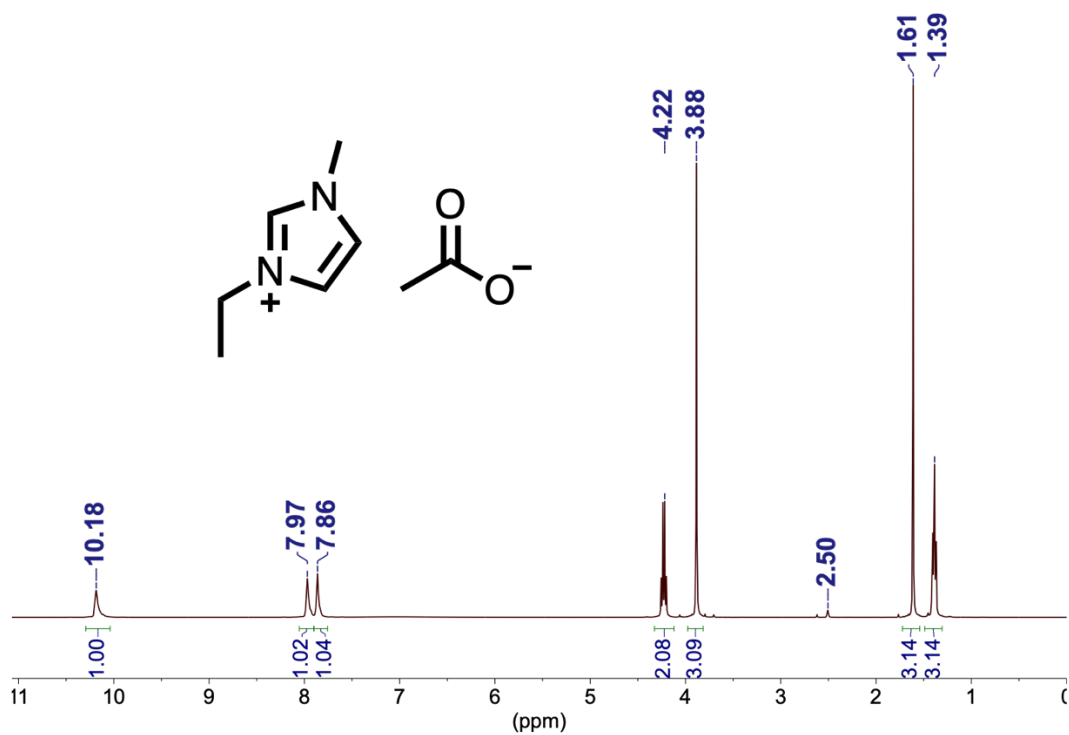

**Supplementary Figure 2.**  $^1\text{H}$ -NMR spectra of neat  $[\text{C}_2\text{mim}][\text{OAc}]$  and dopamine monomer in  $\text{DMSO-d}_6$ .

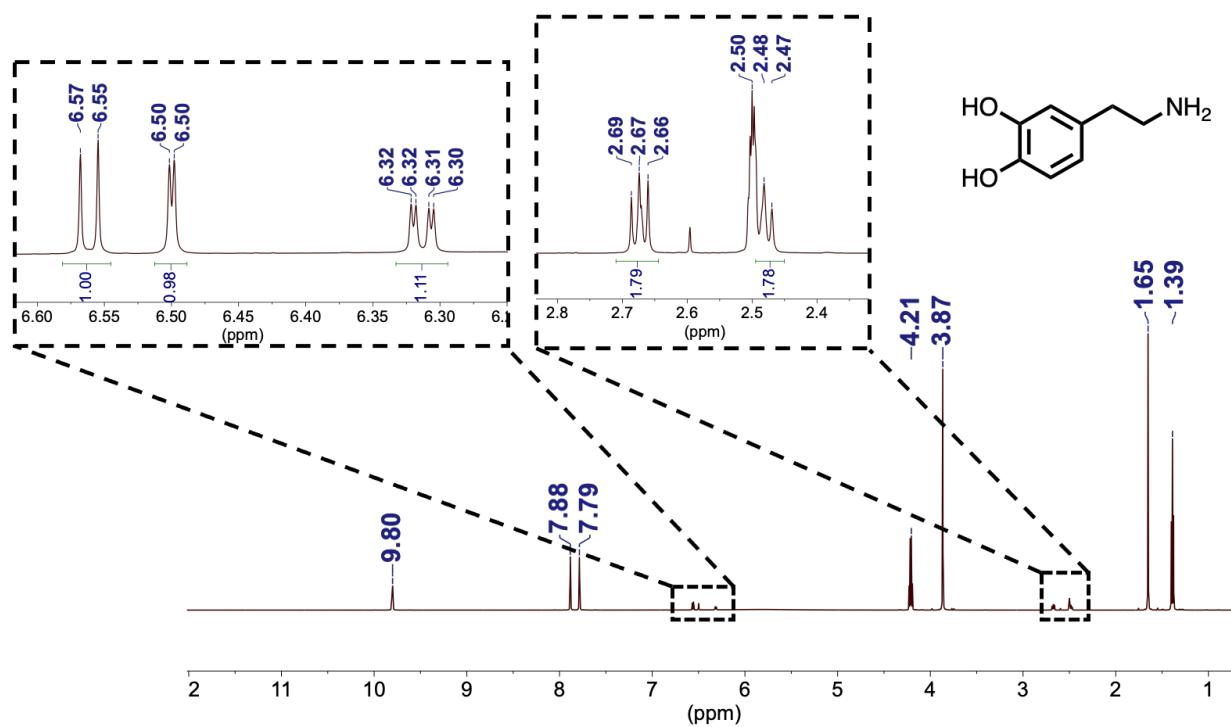

**Supplementary Figure 3.**  $^1\text{H}$ -NMR spectra of dopamine hydrochloride dissolved in  $[\text{C}_2\text{mim}][\text{OAc}]$  and recorded in  $\text{DMSO-d}_6$  (only dopamine signals are shown and zoomed out in the inset).



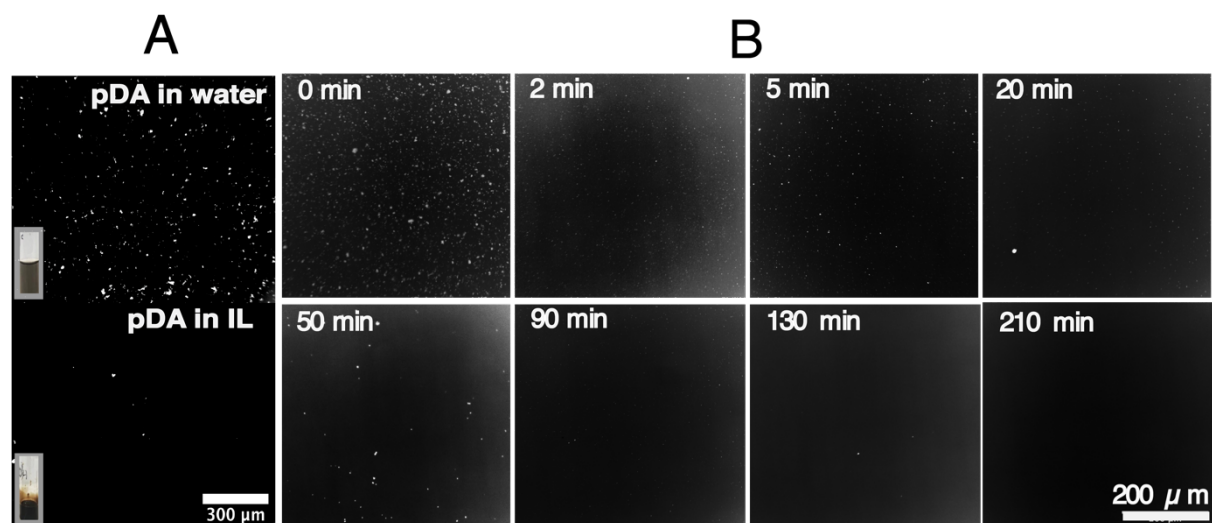

**Supplementary Figure 4.** Polarized optical microscopy images showing particles of pDA in (A) 2 mg of pDA dispensed in 2mL of water and 5 mg of pDA in 200μL of [C<sub>2</sub>mim][OAc] (B) 3 mg of pDA dispensed in 200 μL [C<sub>2</sub>mim] [OAc] captured at different time intervals. The scale bar of 300 μm applies to the two images in a) and the scale bar of 200 μm applies to the eight images in b).

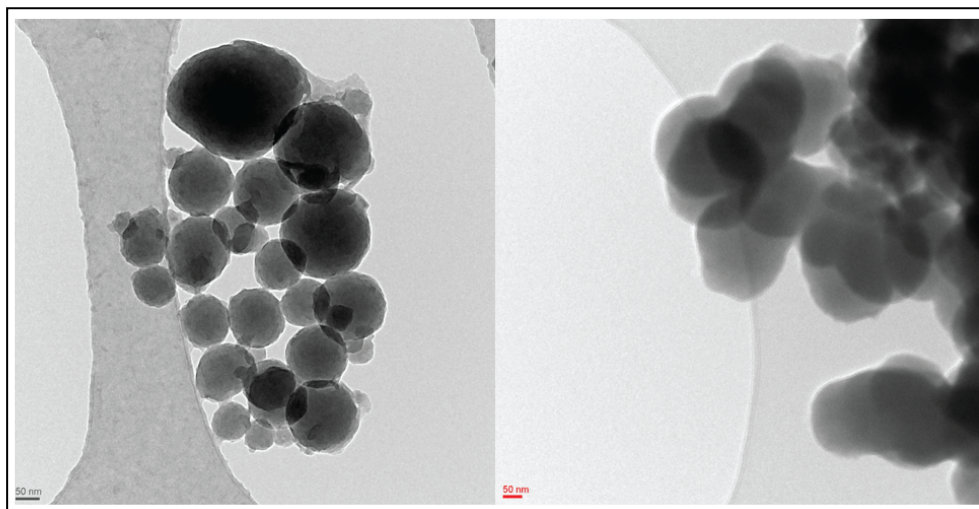

**Supplementary Figure 5.** Transmission electron microscopy images synthesized in TRIS and pDA recovered from IL (scale bar = 50 nm).

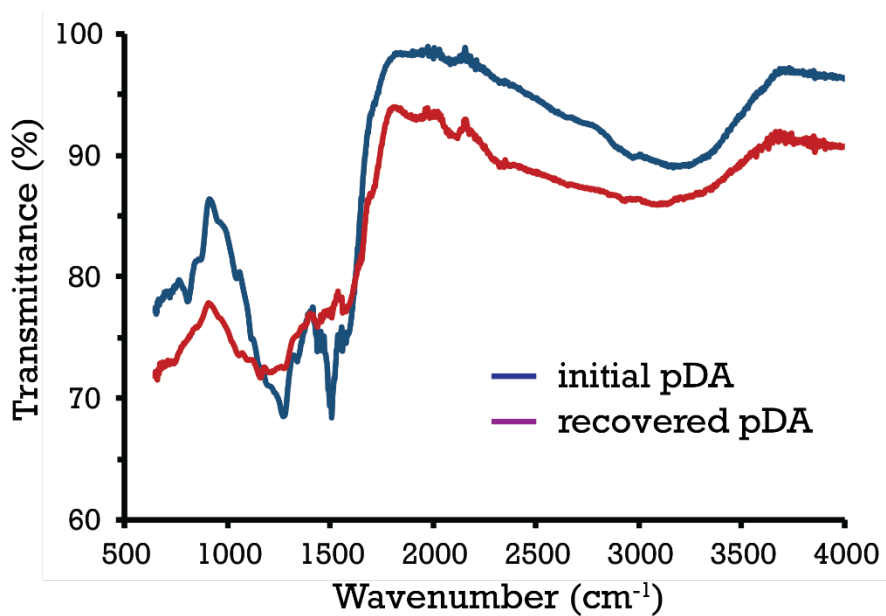

**Supplementary Figure 6.** Solid state FTIR of pDA synthesized in TRIS and pDA recovered from IL.

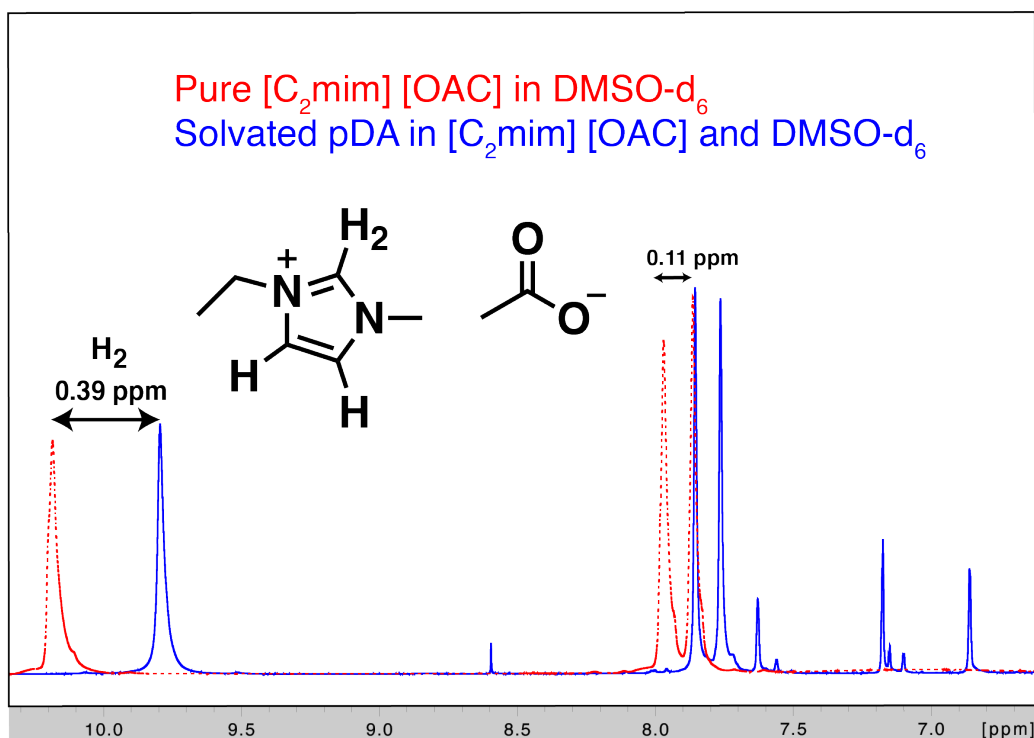

**Supplementary Figure 7.** <sup>1</sup>H-NMR spectra of [C<sub>2</sub>mim][OAc] (in red) and pDA - [C<sub>2</sub>mim][OAc] (blue) in DMSO-d<sub>6</sub>.

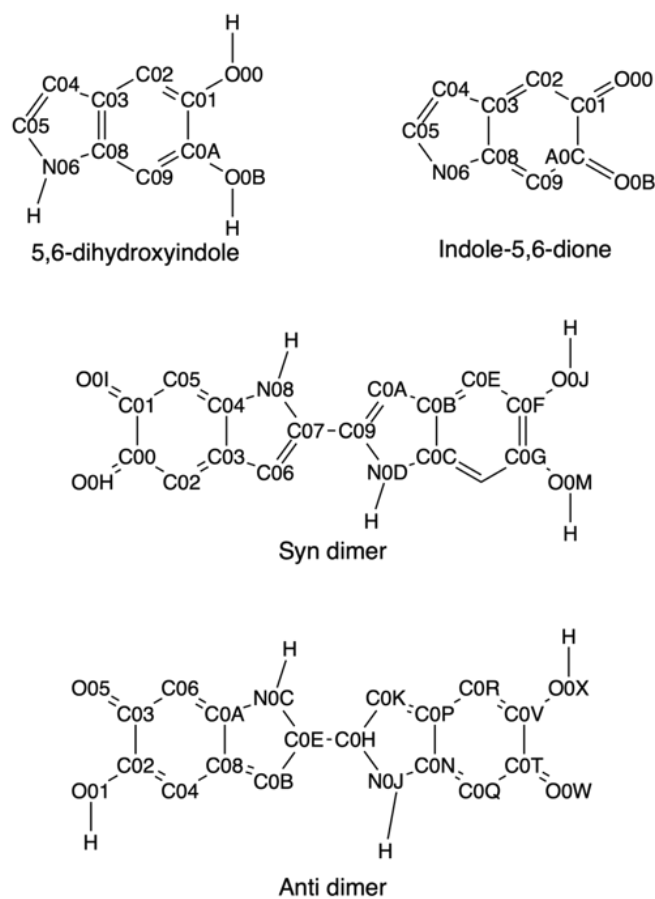

**Supplementary Figure 8.** Atom types of each solute used in MD simulations.

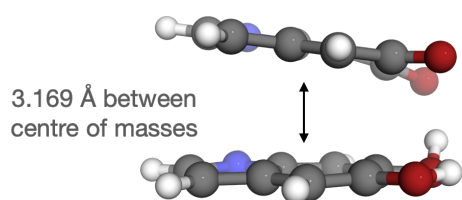

**Supplementary Figure 9.** Distance between the center of masses of an indole-dione...dihydroxyindole  $\pi$ -stacked pair.

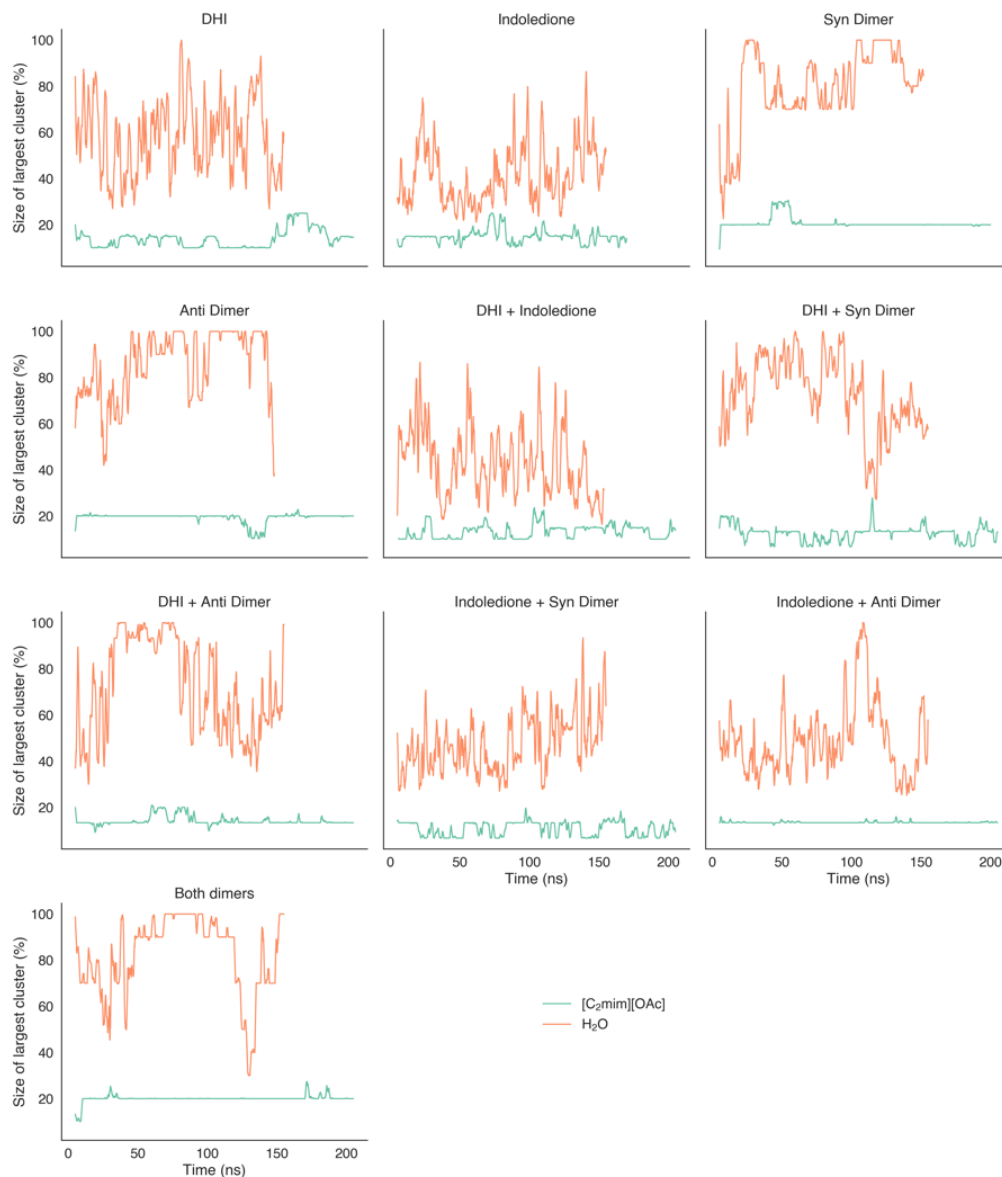

**Supplementary Figure 10.** Raw data produced by *gmx clustsize*, reporting the number of molecules in the largest cluster of each simulation at each timestep. Due to the varying numbers of solute molecules in each simulation, results were processed so that the size of each cluster is given as a percentage of solute molecules in each simulation. Cluster sizes were determined using a 4 Å cutoff and percentages are given to allow for comparisons between each simulation – simulations involving only monomers included 20 solute molecules, simulations involving

mixtures used 10 of each monomer and 5 of each dimer, as detailed in the theoretical section above. As an example in the case of both syn and anti dimers, there are 10 solute molecules in total, therefore when 5 molecules aggregate to form the largest cluster in that particular trajectory frame, a value of 50 % is plotted.

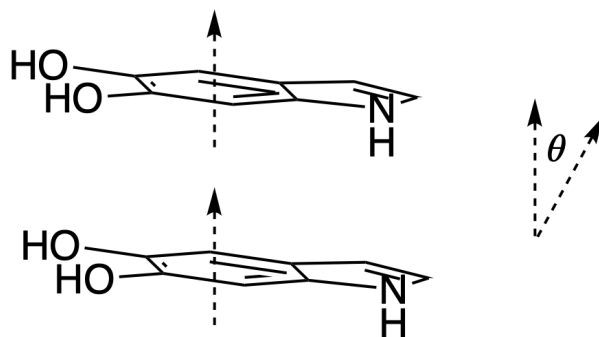

**Supplementary Figure 11.** Depiction of vectors used to describe the angle of  $\pi$ - $\pi$  stacking in this study.

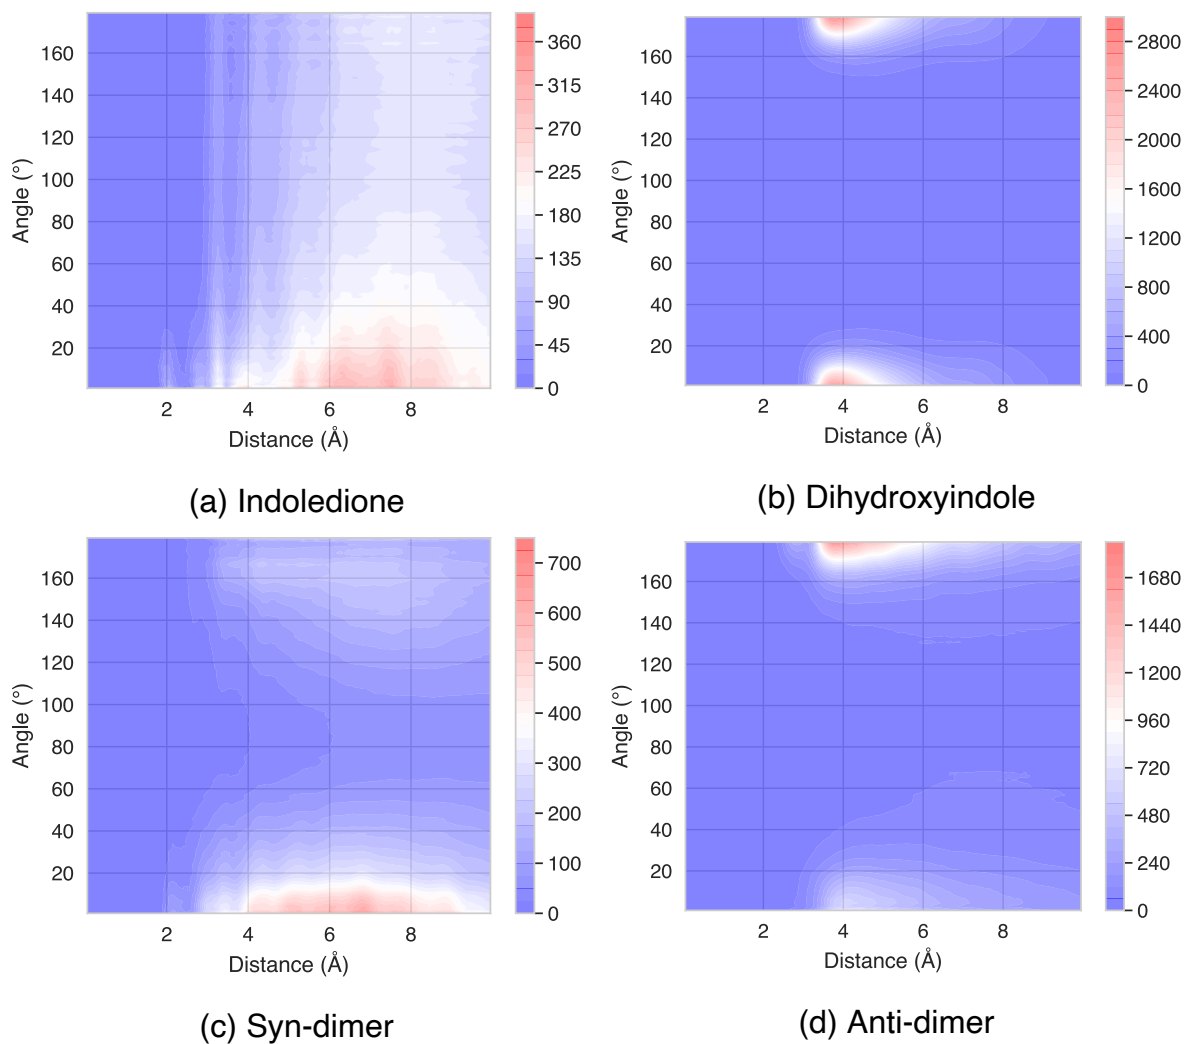

**Supplementary Figure 12.** Intermolecular distance-angle correlations of simulations containing one type of solute only.

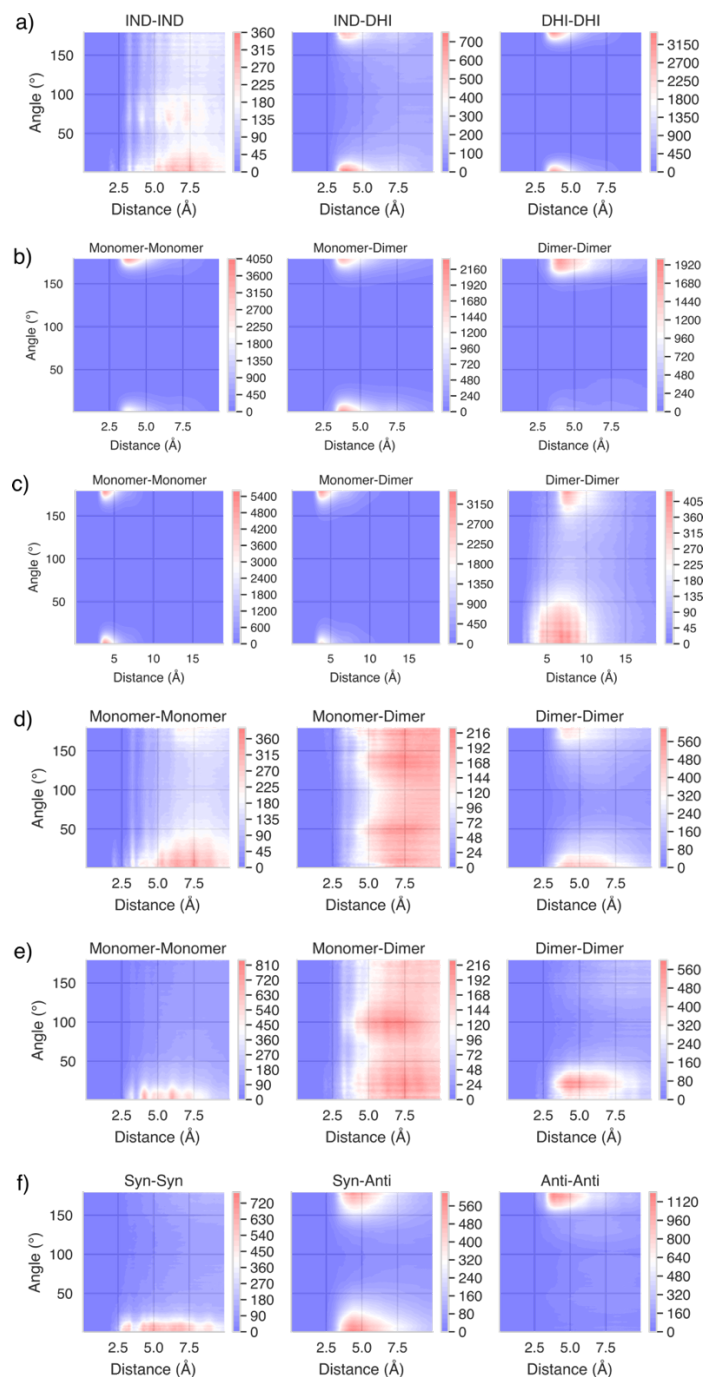

**Supplementary Figure 13.** Intermolecular distance-angle correlations of **a)** indole-dione interacting with dihydroxyindole. **b)** dihydroxyindole interacting with the anti-dimer **c)** dihydroxyindole interacting with the syn-dimer **d)** indole-dione interacting with the anti-dimer **e)** indole-dione interacting with the syn-dimer **f)** syn-dimer interacting with the anti-dimer.



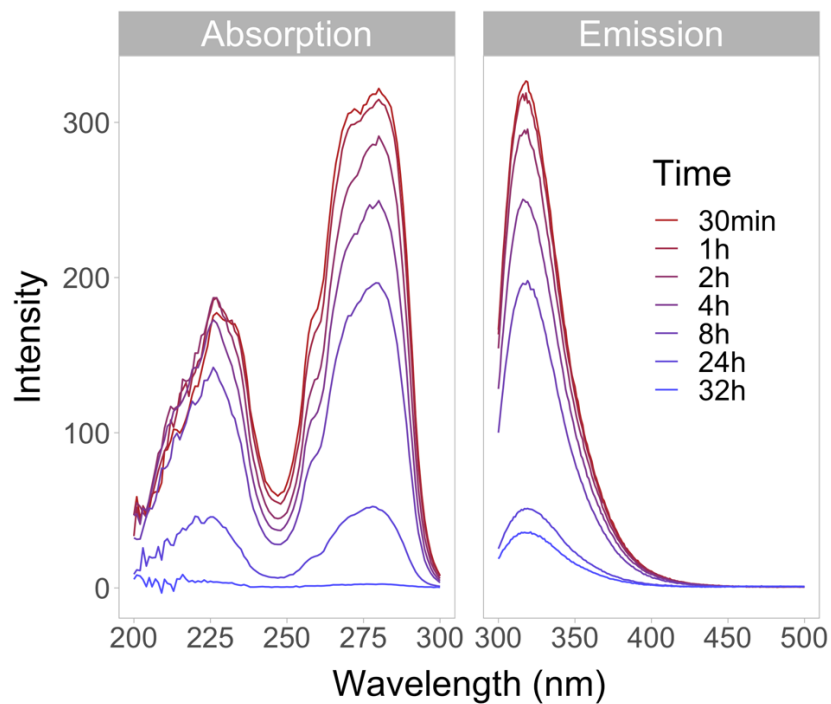

**Supplementary Figure 14.** Experimental absorption and fluorescence spectra of dopamine polymerized in water. Excitation and emission were studied at 280 nm and 320 nm respectively, with spectra recorded over a 32-hour period.

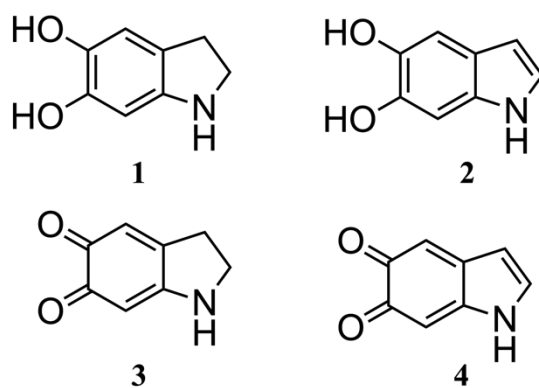

**Supplementary Figure 15.** Monomer variants investigated computationally.

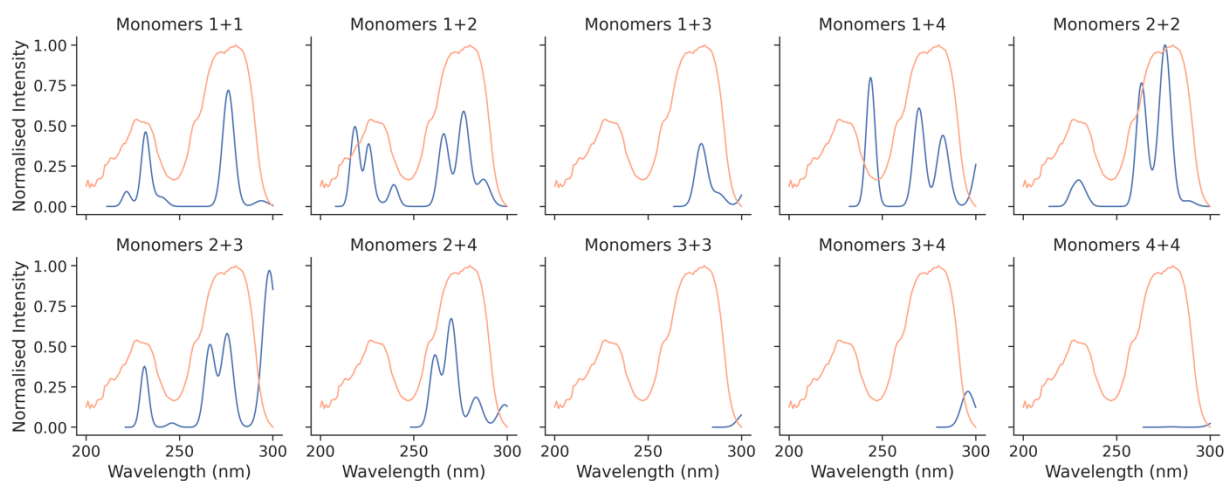

**Supplementary Figure 16.** Absorption of  $\pi$ -stacked dopamine monomers in water compared to experiment, calculated at the  $\omega$ B97XD/aug-cc-pVDZ level using the SMD solvation model. Combinations of each variant in fig. S15 were used here.

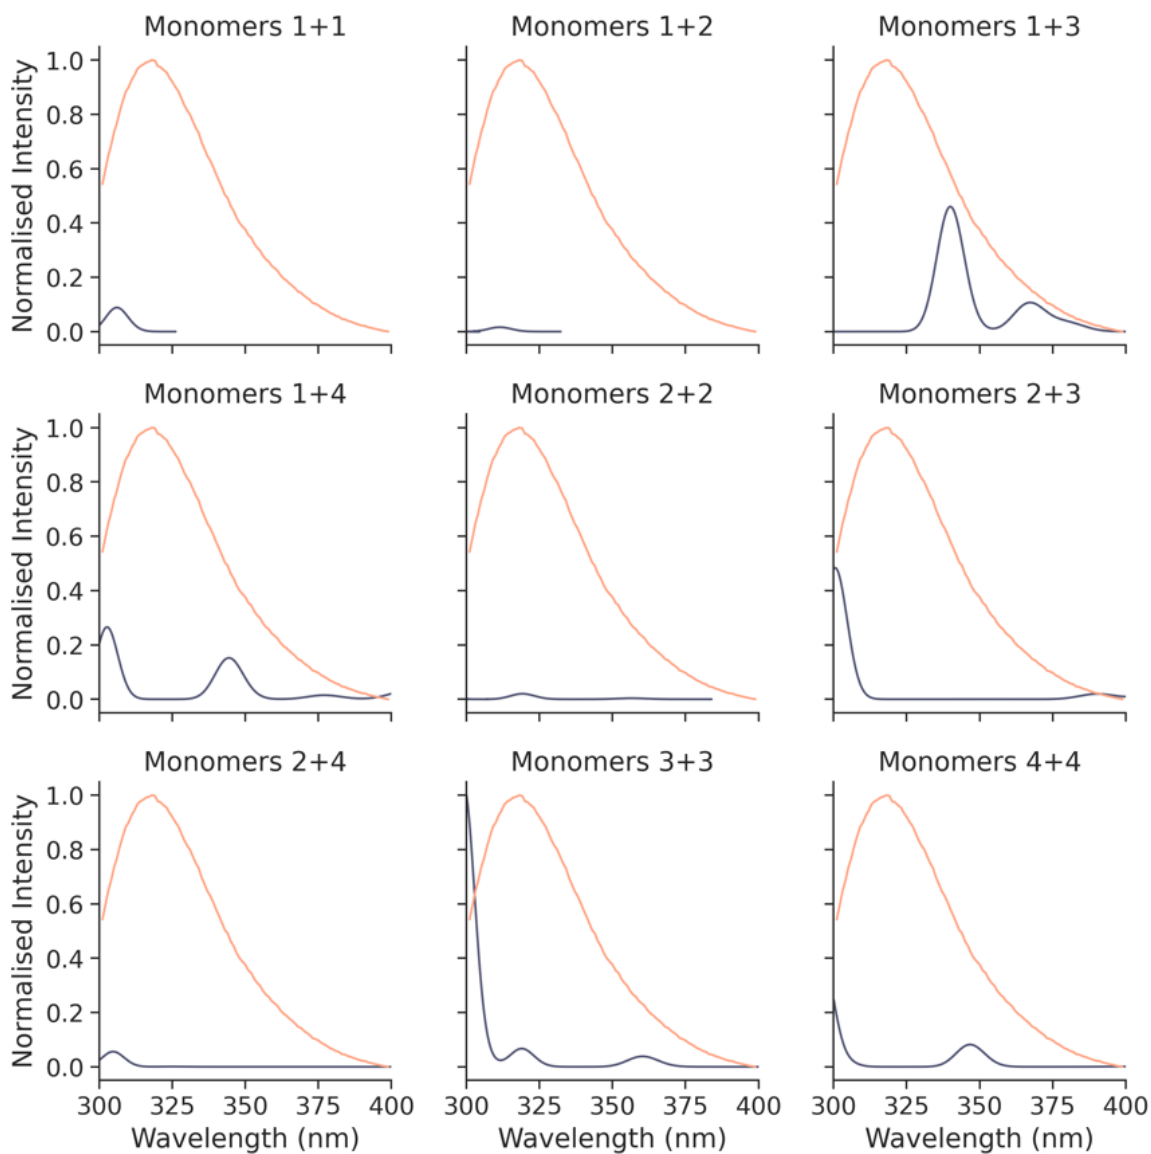

**Supplementary Figure 17.** Predicted fluorescence spectra of dopamine monomers outlined in fig. S14, calculated at the  $\omega$ B97XD/aug-cc-pVDZ level using the SMD solvation model. Combinations of each variant in fig. S15 were used here, and the most intense emission from each combination is shown.

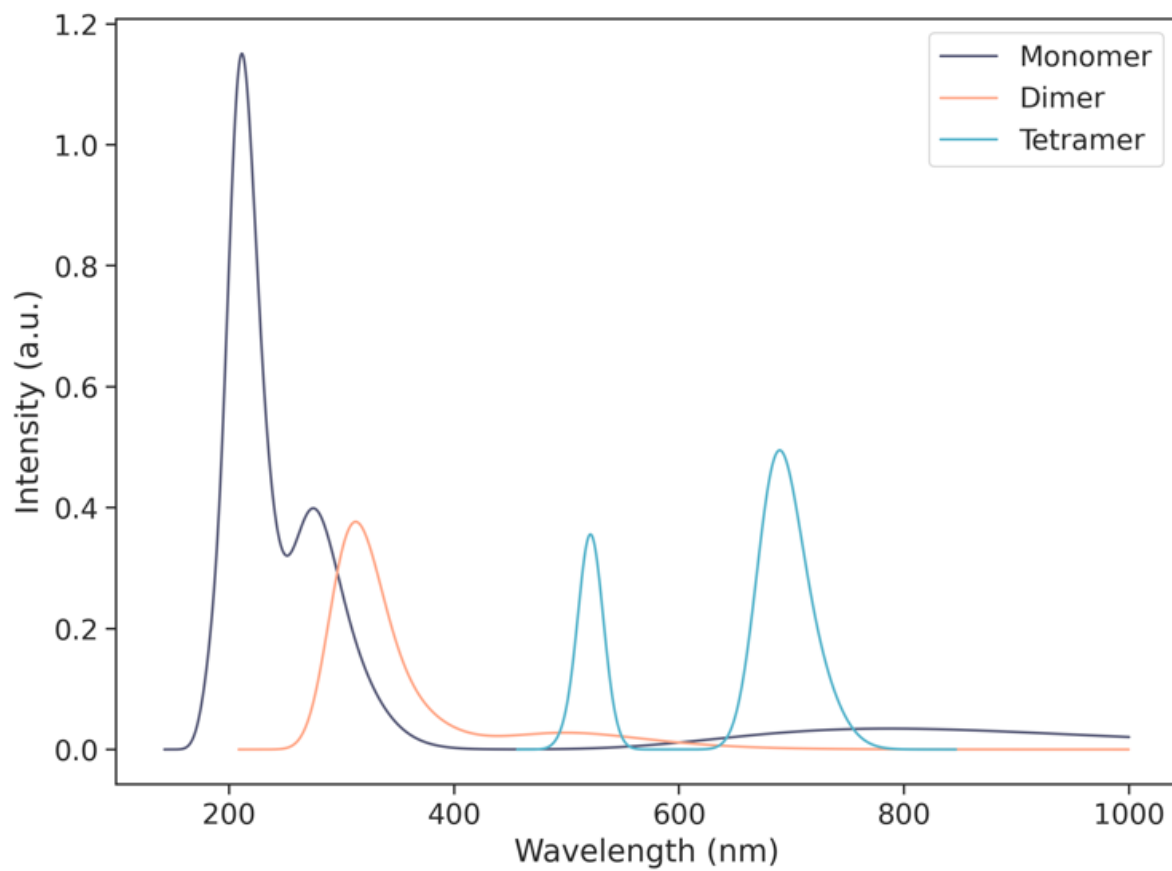

**Supplementary Figure 18.** Absorption of increasingly larger aggregates of monomer **4** (see Fig. 1 of the main manuscript) in fig. S12. Note the increase in wavelength as cluster size increases.

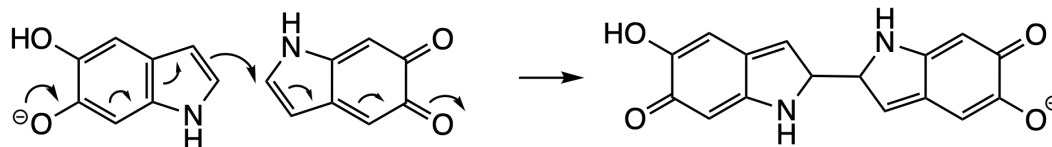

**Supplementary Figure 19.** Anti-dimerization of dopamine, observed in a mixture of [C<sub>2</sub>mim][OAc] and DMSO.

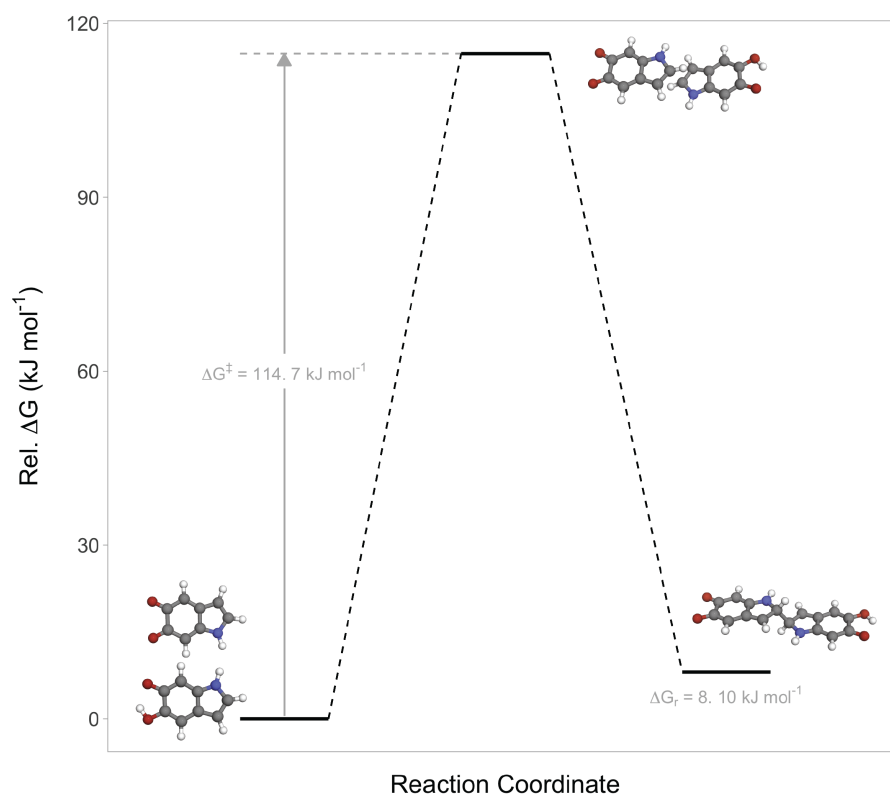

**Supplementary Figure 20.** Free energy barrier associated with the anti-dimerization of dihydroxyindole and indole-1,3-dione found in supramolecular polydopamine.

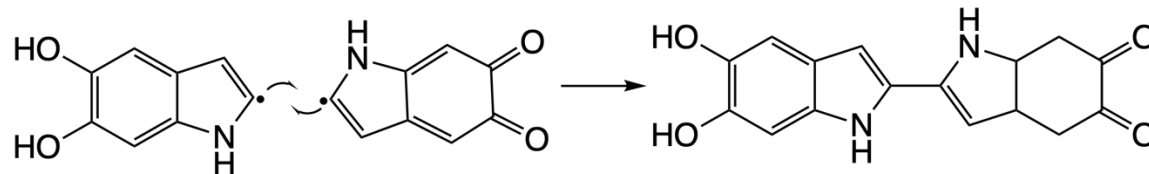

**Supplementary Figure 21.** Syn-dimerization of dopamine, observed in a mixture of [C<sub>2</sub>mim][OAc] and DMSO.

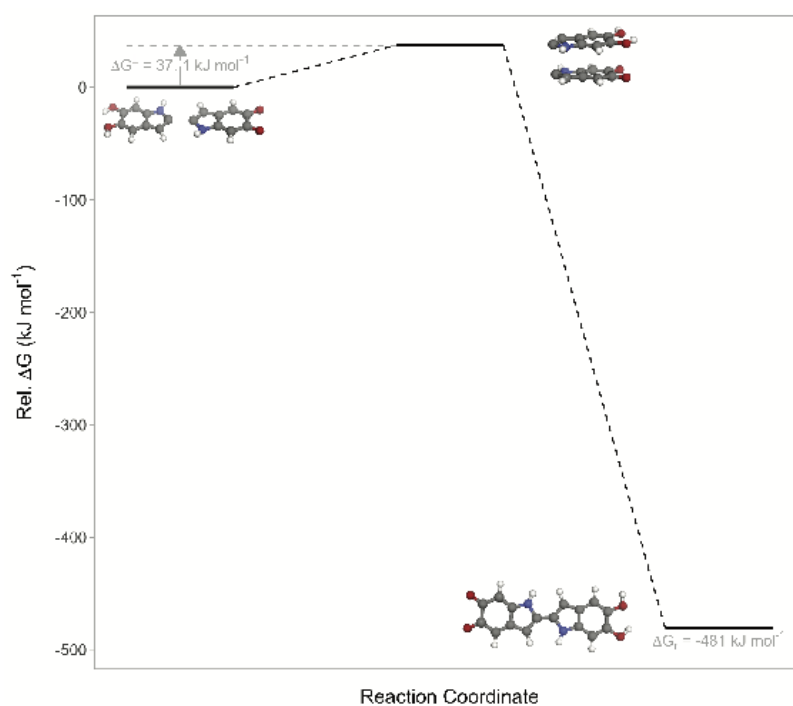

**Supplementary Figure 22.** Free energy barrier associated with the syn-dimerization of dihydroxyindole and indole-3-one found in supramolecular polydopamine.

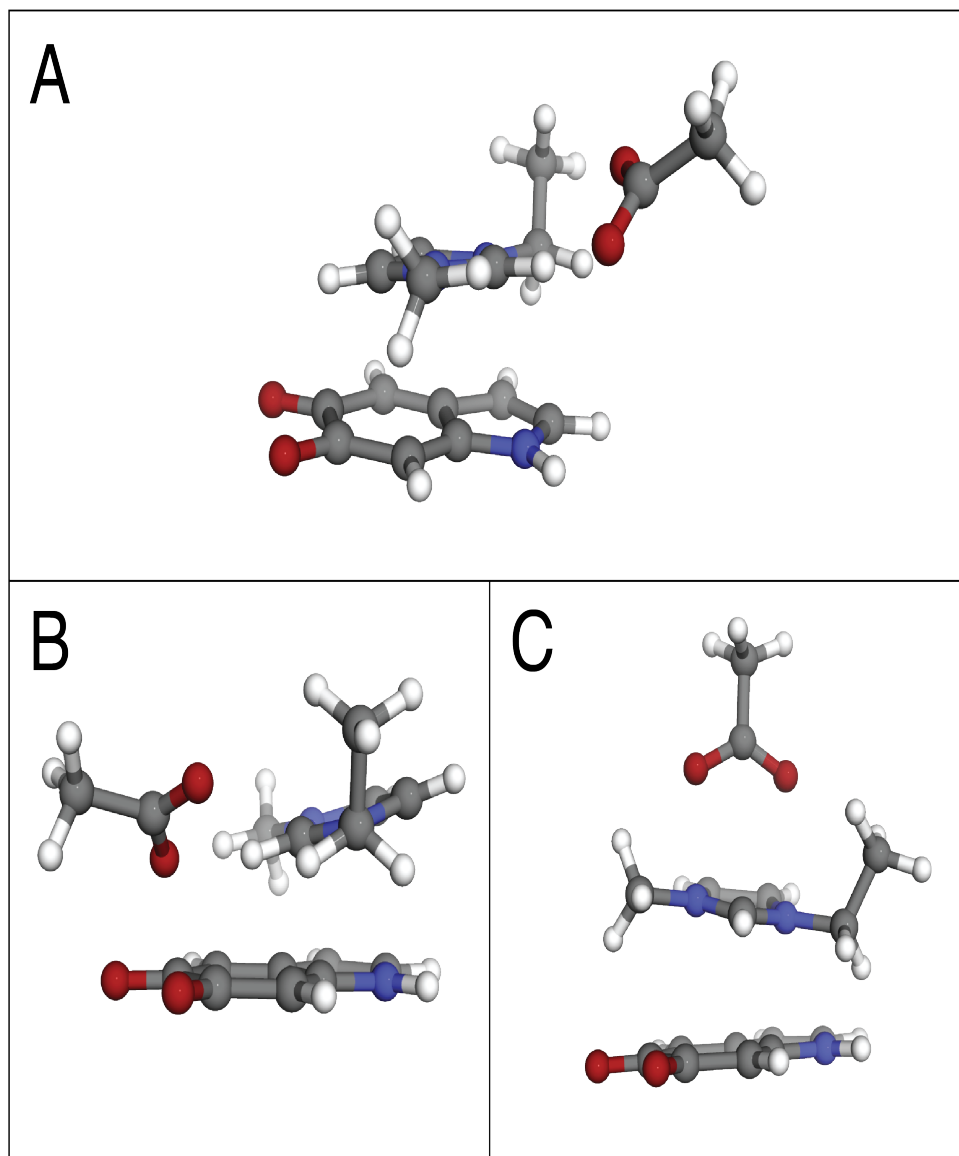

**Supplementary Figure 23.** Optimized configurations shown for each dopamine/IL combination:  $\pi$  stacking of the cation and cyclized dopamine with the carbonyls of cyclized dopamine oriented away (A) or towards (B) the anion or  $\pi$  stacking of the cation, anion and cyclized dopamine(C).

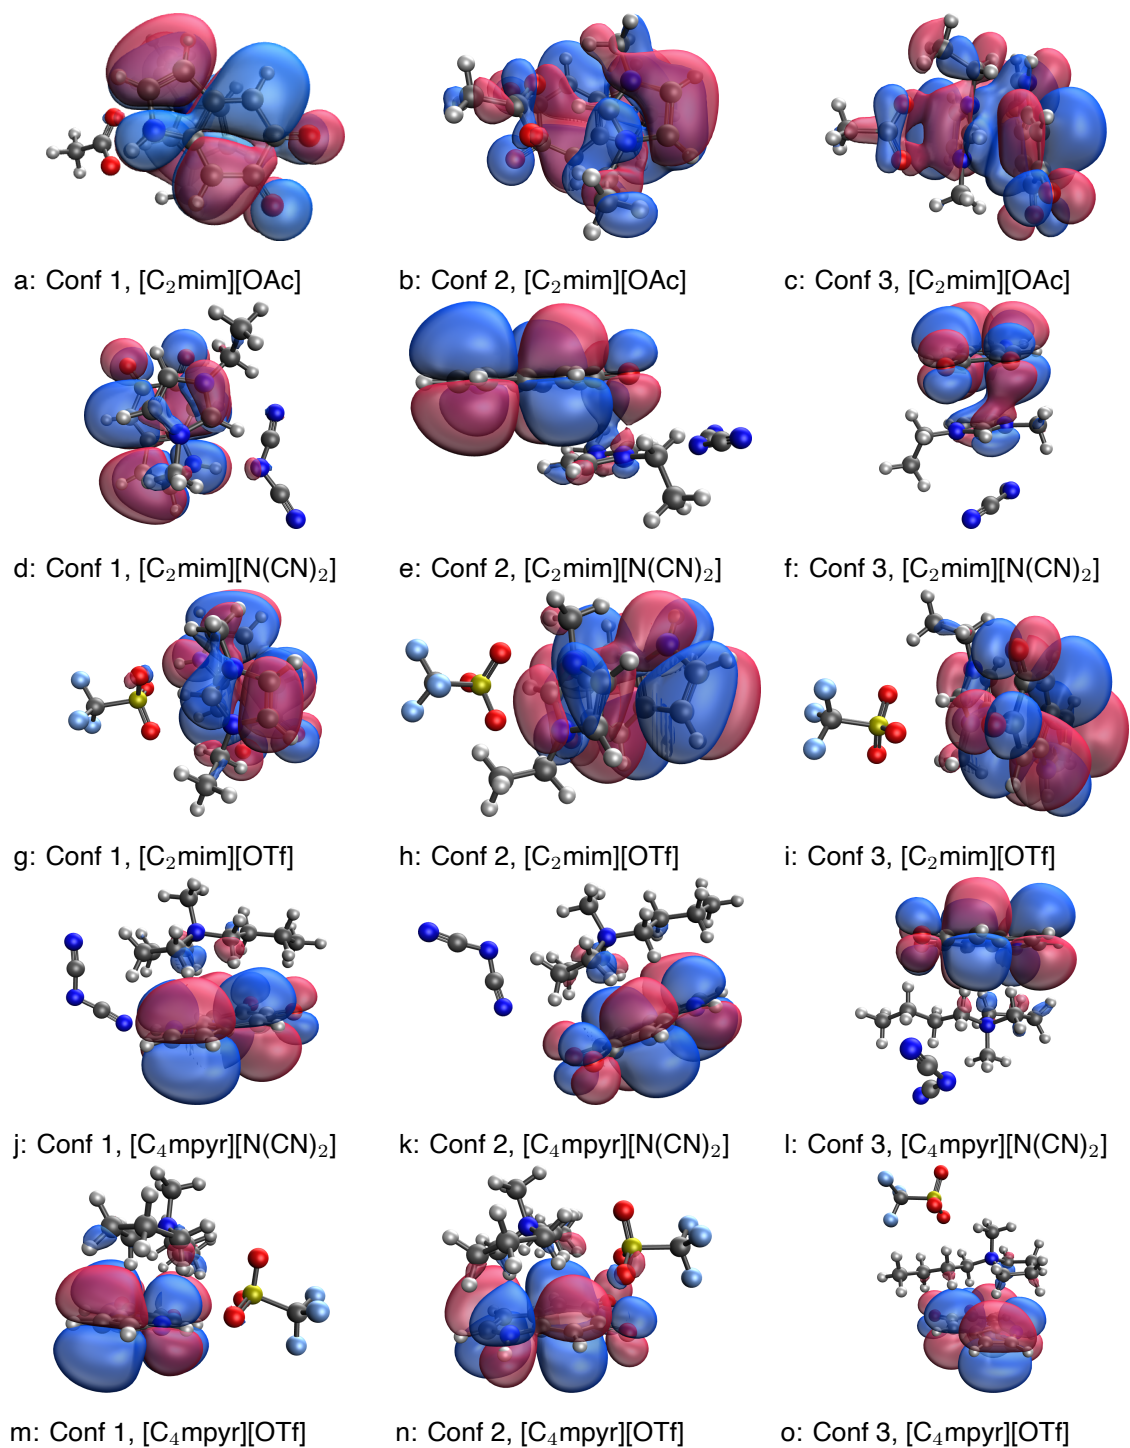

**Supplementary Figure 24.** HOMOs for each indoledione configuration with the five ionic liquids studied. Calculations were performed with HF/cc-pVTZ.



## 2. Supplementary tables

**Supplementary table 1.** 5,6-dihydroxyindole polarizabilities calculated at the M062X/cc-pVTZ level. Atom types correspond to those in Fig. S8. See theoretical section for more details.

| Atom type | $\alpha$ ( $\text{\AA}^3$ ) |
|-----------|-----------------------------|
| O00       | 0.80                        |
| C01       | 1.30                        |
| C02       | 1.36                        |
| C03       | 1.40                        |
| C04       | 1.28                        |
| C05       | 1.20                        |
| N06       | 1.10                        |
| C08       | 1.37                        |
| C09       | 1.37                        |
| C0A       | 1.30                        |
| O0B       | 0.82                        |

**Supplementary table 2.** Indole-5,6-dione polarizabilities calculated at the M062X/cc-pVTZ level. Atom types correspond to those in Fig. S8. See theoretical section for more details.

| Atom type | $\alpha$ ( $\text{\AA}^3$ ) |
|-----------|-----------------------------|
| O00       | 1.11                        |
| C01       | 1.53                        |

|     |      |
|-----|------|
| C02 | 1.55 |
| C03 | 1.55 |
| C04 | 1.45 |
| C05 | 1.20 |
| N06 | 1.18 |
| C08 | 1.49 |
| C09 | 1.57 |
| C0A | 1.55 |
| O0B | 1.10 |

**Supplementary table 3.** Syn dimer polarizabilities calculated at the M062X/cc-pVTZ level.

Atom types correspond to those in Fig. S8. See theoretical section for more details.

| Atom type | $\alpha$ (Å <sup>3</sup> ) |
|-----------|----------------------------|
| C00       | 1.70                       |
| C01       | 1.75                       |
| C02       | 2.00                       |
| C03       | 2.08                       |
| C04       | 2.01                       |
| C05       | 1.90                       |
| C06       | 2.04                       |
| C07       | 2.79                       |
| N08       | 1.66                       |
| C09       | 3.05                       |
| C0A       | 1.86                       |
| C0B       | 2.02                       |
| C0C       | 2.00                       |
| N0D       | 1.68                       |
| C0E       | 1.77                       |
| C0F       | 1.53                       |
| C0G       | 1.61                       |
| O0H       | 1.13                       |
| O0I       | 1.00                       |
| O0J       | 0.93                       |

|     |      |
|-----|------|
| O0M | 0.99 |
| C0S | 1.79 |

**Supplementary table 4.** Anti-dimer polarizabilities calculated at the M062X/cc-pVTZ level.

Atom types correspond to those in Fig. S8. See theoretical section for more details.

| Atom type | $\alpha$ (Å <sup>3</sup> ) |
|-----------|----------------------------|
| O01       | 0.90                       |
| C02       | 1.48                       |
| C03       | 1.44                       |
| C04       | 1.68                       |
| O05       | 1.13                       |
| C06       | 1.82                       |
| C08       | 1.75                       |
| C0A       | 1.69                       |
| C0B       | 1.58                       |
| N0C       | 1.46                       |
| C0E       | 1.68                       |
| C0H       | 1.68                       |
| N0J       | 1.47                       |
| C0K       | 1.61                       |
| C0N       | 1.70                       |
| C0P       | 1.77                       |
| C0Q       | 1.83                       |

|     |      |
|-----|------|
| C0R | 1.74 |
| C0T | 1.46 |
| C0V | 1.52 |
| O0W | 1.12 |
| O0X | 0.88 |

**Supplementary table 5.** Parameters used to determine  $k_{ij}$  values according to the regression model proposed by Padua et al.

| Molecule           | Charge | Dipole moment (D) | Molecular polarizability ( $\text{\AA}^3$ ) |
|--------------------|--------|-------------------|---------------------------------------------|
| C <sub>2</sub> mim | 1      | 1.1558            | 12.38                                       |
| OAc                | -1     | 3.1851            | 5.705                                       |
| Dihydroxyindole    | 0      | 3.4446            | 15.291                                      |
| Indoledione        | 0      | 9.4527            | 17.02                                       |
| Syn dimer          | 0      | 11.3343           | 41.92                                       |
| Anti dimer         | 0      | 1.7854            | 36.5235                                     |
| Water              | 0      | 2.0249            | 1.382                                       |

**Supplementary Table 6.** Parameters used to reduce the strength of non-bonding LJ terms between molecules, accounting for the explicit polarization that Drude particles provide.

| Interaction                             | COM separation ( $\text{\AA}$ ) | $k_{ij}$ |
|-----------------------------------------|---------------------------------|----------|
| C <sub>2</sub> mim...OAc                | 4.073                           | 0.270    |
| C <sub>2</sub> mim...Ind                | 3.401                           | 0.780    |
| C <sub>2</sub> mim...C <sub>2</sub> mim | 3.056                           | 0.714    |
| Ind...OAc                               | 5.345                           | 0.331    |
| Ind...Ind                               | 3.800                           | 0.938    |
| Ind...Water                             | 5.346                           | 0.598    |

**Supplementary table 7.** Percentage difference in the average aggregate size across the entirety of each simulation when comparing water and [C<sub>2</sub>mim][OAc] solvents, relative to the average

size in [C<sub>2</sub>mim][OAc]. The calculation is explained in detail on page 4, using the output of the `gmx clustsize` program to determine aggregate sizes.

| <b>Solute</b>            | <b>% increase in aggregate size</b> |
|--------------------------|-------------------------------------|
| Anti Dimer               | 66.7                                |
| Both Dimers              | 62.1                                |
| DHI + Syn Dimer          | 60.3                                |
| Syn Dimer                | 60.0                                |
| DHI + Anti Dimer         | 58.3                                |
| DHI                      | 44.3                                |
| Indoledione + Syn Dimer  | 36.3                                |
| Indoledione + Anti Dimer | 35.8                                |
| DHI + Indoledione        | 30.1                                |
| Indoledione              | 26.7                                |

**Supplementary table 8.** SRS-MP2 interaction energies in kJ mol<sup>-1</sup> between stacked monomer pairs. Monomer numbers directly correspond to the structures in Fig S15.

| <b>Complexes of monomers considered*</b> | <b>Interaction energy (kJ mol<sup>-1</sup>)</b> |
|------------------------------------------|-------------------------------------------------|
| <b>1 + 1</b>                             | -72.7                                           |
| <b>1 + 2</b>                             | -71.4                                           |
| <b>1 + 3</b>                             | -76.6                                           |
| <b>1 + 4</b>                             | -80.7                                           |
| <b>2 + 2</b>                             | -57.4                                           |
| <b>2 + 3</b>                             | -83.5                                           |
| <b>2 + 4</b>                             | -86.0                                           |
| <b>3 + 3</b>                             | -34.9                                           |
| <b>3 + 4</b>                             | -36.9                                           |
| <b>4 + 4</b>                             | -48.5                                           |

\*1 = Protonated form of dihydroxyindole, 2 = dihydroxyindole, 3 = protonated form of indoledione, 4 = indoledione.



**Supplementary table 9.** Electronic energies ( $E_{\text{el}}$ , in Hartrees) and thermodynamics properties\* used to calculate the syn-dimerization reaction barrier.

| Species                                                  | DHI anion  | Indole-5,6-dione | TS         | Product    |
|----------------------------------------------------------|------------|------------------|------------|------------|
| ZPVE (kJ/mol)                                            | 320.90282  | 301.39571        | 630.7896   | 637.72456  |
| TC (kJ/mol)                                              | 25.23229   | 35.83097         | 58.33232   | 56.23094   |
| $S_{\text{total}}$ (J/mol/K)                             | 345.91119  | 404.58928        | 525.21016  | 511.66024  |
| $E_{\text{el}}(\omega\text{B97xD/aug-cc-pVTZ})$          | -513.72037 | -513.00747       | -1026.7445 | -1026.7649 |
| $E_{\text{el}}(\text{M05-2X/6-311+G}^{**}(\text{gas}))$  | -513.8007  | -513.08666       | -1026.904  | -1026.9185 |
| $E_{\text{el}}(\text{M05-2X/6-311+G}^{**}(\text{solv}))$ | -513.90484 | -513.11534       | -1027.0107 | -1027.0491 |
| $\Delta H^{\ddagger}(\text{gas, kJ/mol})$                | -1348426.7 | -1346563.9       | -2695028.5 | -2695077.4 |
| $\Delta G^{\ddagger}(\text{gas, kJ/mol})$                | -1348555.8 | -1346714.9       | -2695224.4 | -2695268.3 |
| $\Delta\Delta G(\text{solv, kJ/mol})$                    | -273.42552 | -75.29103        | -280.11192 | -342.89206 |
| $\Delta G(\text{solv, kJ/mol})$                          | -1348829.2 | -1346790.1       | -2695504.6 | -2695611.2 |
| Rel. $\Delta G(\text{solv, kJ/mol})$                     | 0          | 0                | 114.786336 | 8.09964148 |

\* ZPVE = Zero-point vibrational energy; TC = temperature correction (formula is shown in the theoretical section at the top of this document);  $S_{\text{total}}$  = Total entropy contribution ( $S_{\text{el}} + S_{\text{vib}} + S_{\text{rot}} + S_{\text{trans}}$ );  $E_{\text{el}}$  = electronic energy;  $\Delta H^{\ddagger}$  = Change in enthalpy from the reactants to the transition state;  $\Delta G^{\ddagger}$  = Change in Gibbs' free energy from the reactants to the transition state;  $\Delta\Delta G$  = Gibbs' free energy correction to reflect solvation effects (calculated from the M05-2X/6-311+G<sup>\*\*</sup> energies,  $\Delta G_{\text{solv}} - \Delta G_{\text{gas}}$ );  $\Delta G$  = summation of all terms to give the total Gibbs' free energy for each species; Rel.  $\Delta G = \Delta G(\text{TS}) - \Delta G(\text{Reactants})$

**Supplementary table 10.** Electronic energies ( $E_{\text{el}}$ , in Hartrees) and thermodynamics properties\* used to calculate the syn-dimerization reaction barrier.

| Species                                                  | Reactant 1 | Reactant 2 | TS         | Product    |
|----------------------------------------------------------|------------|------------|------------|------------|
| ZPVE (kJ/mol)                                            | 251.23005  | 316.04037  | 597.45089  | 600.53568  |
| TC (kJ/mol)                                              | 24.00334   | 26.45806   | 58.89356   | 54.94723   |
| $S_{\text{total}}$ (J/mol/K)                             | 347.04976  | 357.33028  | 527.4241   | 501.93034  |
| $E_{\text{el}}(\omega\text{B97xD/ aug-cc-pVTZ})$         | -512.30067 | -513.56359 | -1025.8945 | -1026.0914 |
| $E_{\text{el}}(\text{M05-2X/6-311+G}^{**}(\text{gas}))$  | -512.37501 | -513.62567 | -1026.0482 | -1026.2456 |
| $E_{\text{el}}(\text{M05-2X/6-311+G}^{**}(\text{solv}))$ | -512.39836 | -513.65507 | -1026.0965 | -1026.2976 |
| $\Delta H^{\ddagger}$ (gas, kJ/mol)                      | -1344770.2 | -1348018.7 | -2692829.5 | -2693347.6 |
| $\Delta G^{\ddagger}$ (gas, kJ/mol)                      | -1344899.7 | -1348152.1 | -2693026.4 | -2693534.8 |
| $\Delta\Delta G$ (solv, kJ/mol)                          | -61.302442 | -77.169489 | -126.74536 | -136.37944 |
| $\Delta G$ (solv, kJ/mol)                                | -1344961   | -1348229.2 | -2693153.1 | -2693671.2 |
| Rel. $\Delta G$ (solv, kJ/mol)                           | 0          | 0          | 37.1102211 | -481.01996 |

\* ZPVE = Zero-point vibrational energy; TC = temperature correction (formula is shown in the theoretical section at the top of this document);  $S_{\text{total}}$  = Total entropy contribution ( $S_{\text{el}} + S_{\text{vib}} + S_{\text{rot}} + S_{\text{trans}}$ );  $E_{\text{el}}$  = electronic energy;  $\Delta H^{\ddagger}$  = Change in enthalpy from the reactants to the transition state;  $\Delta G^{\ddagger}$  = Change in Gibbs' free energy from the reactants to the transition state;  $\Delta\Delta G$  = Gibbs' free energy correction to reflect solvation effects (calculated from the M05-2X/6-311+G\*\* energies,  $\Delta G_{\text{solv}} - \Delta G_{\text{gas}}$ );  $\Delta G$  = summation of all terms to give the total Gibbs' free energy for each species; Rel.  $\Delta G$  =  $\Delta G$  (TS) -  $\Delta G$  (Reactants)

1. Dreyer, D. R., Miller, D. J., Freeman, B. D., Paul, D. R. & Bielawski, C. W. Elucidating the structure of poly(dopamine). *Langmuir* **28**, 6428–6435 (2012).
2. Hong, S. *et al.* Non-covalent self-assembly and covalent polymerization co-contribute to polydopamine formation. *Advanced Functional Materials* **22**, 4711–4717 (2012).
3. Liebscher, J. *et al.* Structure of polydopamine: A never-ending story? *Langmuir* **29**, 10539–10548 (2013).
4. della Vecchia, N. F. *et al.* Tris buffer modulates polydopamine growth, aggregation, and paramagnetic properties. *Langmuir* **30**, 9811–9818 (2014).
5. Chen, C. T., Martin-Martinez, F. J., Jung, G. S. & Buehler, M. J. Polydopamine and eumelanin molecular structures investigated with ab initio calculations. *Chemical Science* **8**, 1631–1641 (2017).
6. Ding, Y. *et al.* Insights into the Aggregation/Deposition and Structure of a Polydopamine Film. *Langmuir* **30**, 12258–12269 (2014).
7. Hong, S., Wang, Y., Park, S. Y. & Lee, H. Progressive fuzzy cation- assembly of biological catecholamines. *Science Advances* **4**, 1–11 (2018).
8. Alfieri, M. L. *et al.* Structural Basis of Polydopamine Film Formation: Probing 5,6-Dihydroxyindole-Based Eumelanin Type Units and the Porphyrin Issue. *ACS Applied Materials and Interfaces* **10**, 7670–7680 (2018).
9. Delparastan, P., Malollari, K. G., Lee, H. & Messersmith, P. B. Direct Evidence for the Polymeric Nature of Polydopamine. *Angewandte Chemie - International Edition* **58**, 1077–1082 (2019).
